# Supplementary material for: Comprehending the effect of MMoO4(M = Co, Ni) nanoflakes on improving the electrochemical performance of NiO electrodes
Source: Royal Society of Chemistry journal article supplement (doi:10.1039/c5dt03636d), 2015-01-01
Supplement: c5dt03636d1.pdf [file c5dt03636d1.pdf]

## **Comprehending the effect of $\text{MMoO}_4$ ( $\text{M} = \text{Co}, \text{Ni}$ ) nanoflakes on improving the electrochemical performance of NiO electrodes**

Lei An<sup>a†</sup>, Wenyao Li<sup>a,b†</sup>, Yunjiu Cao<sup>a,c</sup>, Kaibing Xu<sup>a</sup>, Rujia Zou<sup>a,d</sup>, Tao Ji<sup>a,c</sup>, Li Yu<sup>a,e</sup>  
and Junqing Hu<sup>a\*</sup>

<sup>a</sup> State Key Laboratory for Modification of Chemical Fibers and Polymer Materials, College of Materials Science and Engineering, Donghua University, Shanghai 201620, China.

<sup>b</sup> School of Material Engineering, Shanghai University of Engineering Science, Shanghai 201620, China.

<sup>c</sup> School of Fundamental Studies, Shanghai University of Engineering Science, Shanghai 201620, China.

<sup>d</sup> Center of Super-Diamond and Advanced Films (COSDAF), Department of Physics and Materials Science, City University of Hong Kong, Hong Kong.

<sup>e</sup> Ian Wark Research Institute, University of South Australia, Mawson Lakes, SA 5095, Australia.

E-mail: hu.junqing@dhu.edu.cn

<sup>†</sup> These authors contributed equally to the work.

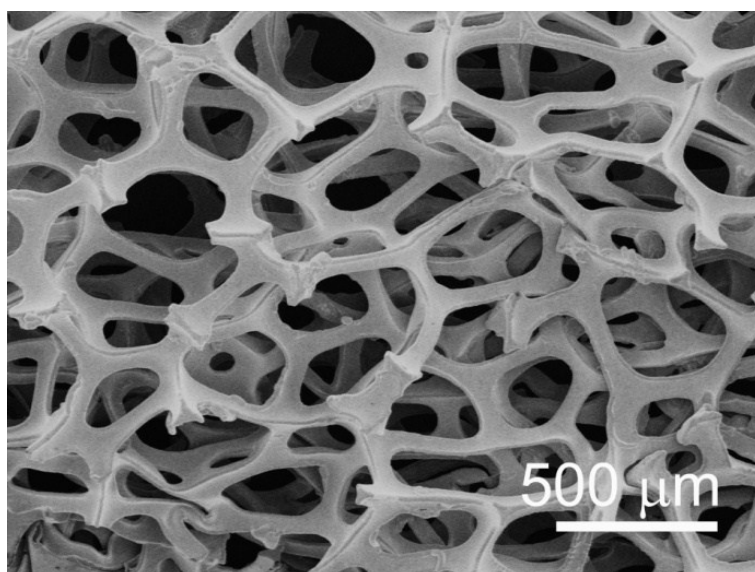

Fig. S1 SEM image of Ni foam.

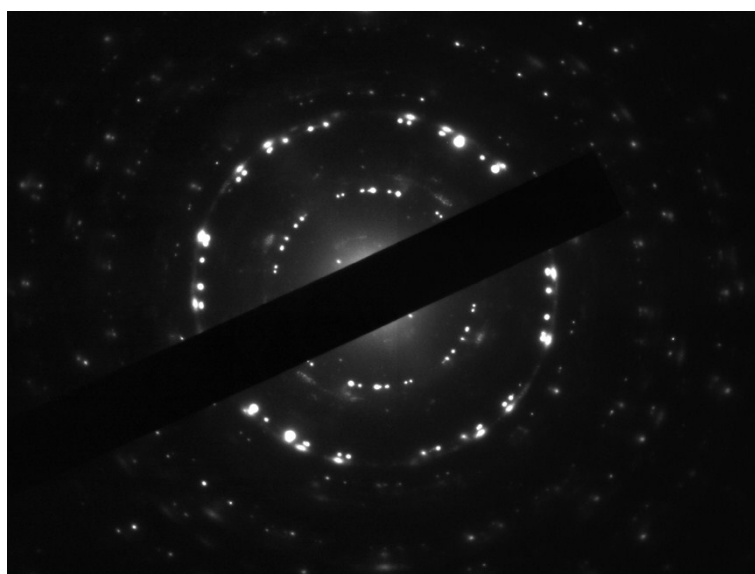

Fig. S2 The SAED image of the NiO nanosheets.

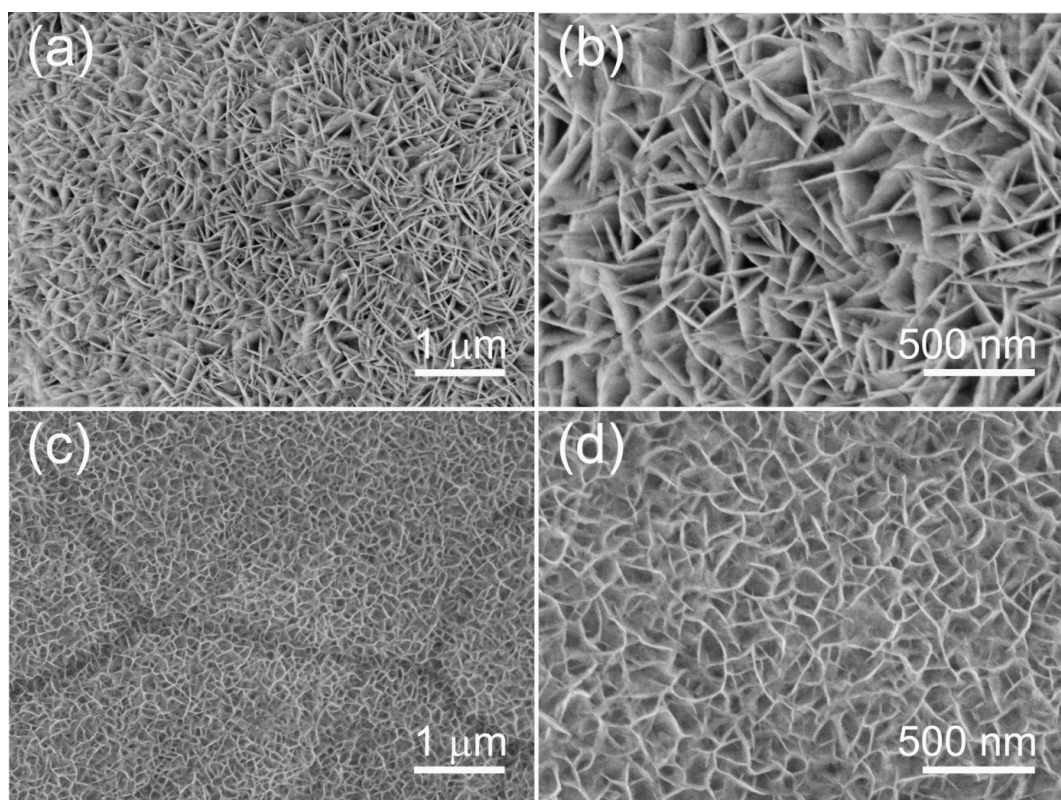

Fig. S3 Low- and high- SEM images of (a, b)  $\text{CoMoO}_4$  and (c, d)  $\text{NiMoO}_4$  nanoflakes directly grown on the Ni foam, respectively.

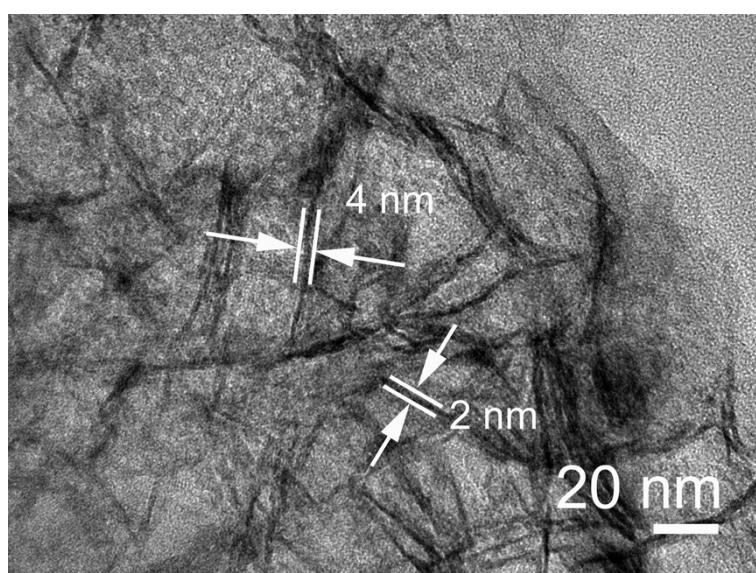

Fig. S4. TEM image of the  $\text{NiO}@\text{NiMoO}_4$  hybrid composites, showing the ultrathin nature of  $\text{NiMoO}_4$  nanoflakes.

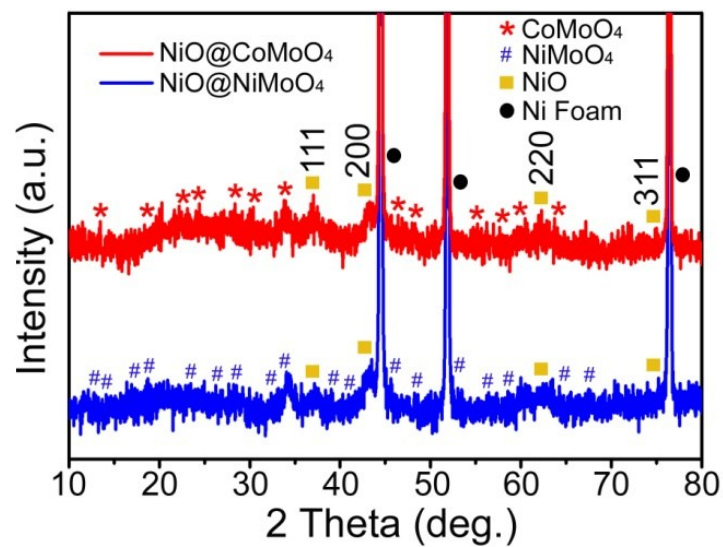

Fig. S5 XRD patterns of  $\text{NiO}@CoMoO_4$  and  $\text{NiO}@NiMoO_4$  hybrid composites on Ni foam.

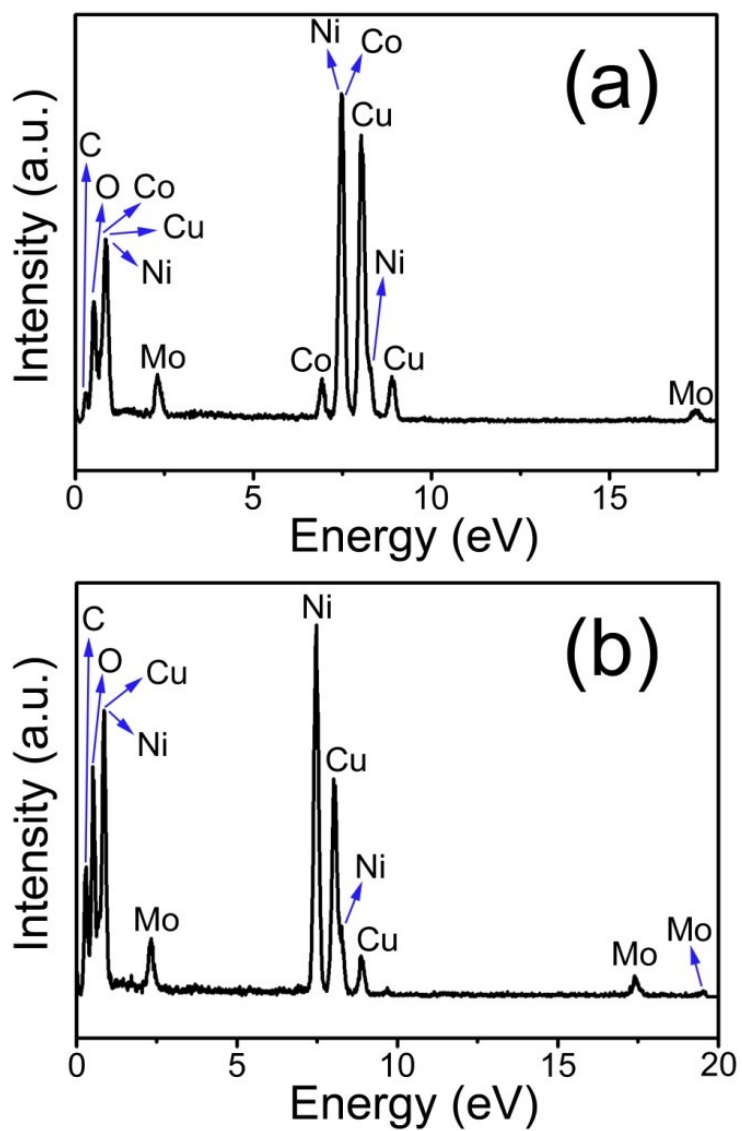



Fig. S6 EDX patterns of the (a) NiO@CoMoO<sub>4</sub> and (b) NiO@NiMoO<sub>4</sub> hybrid composites, respectively.

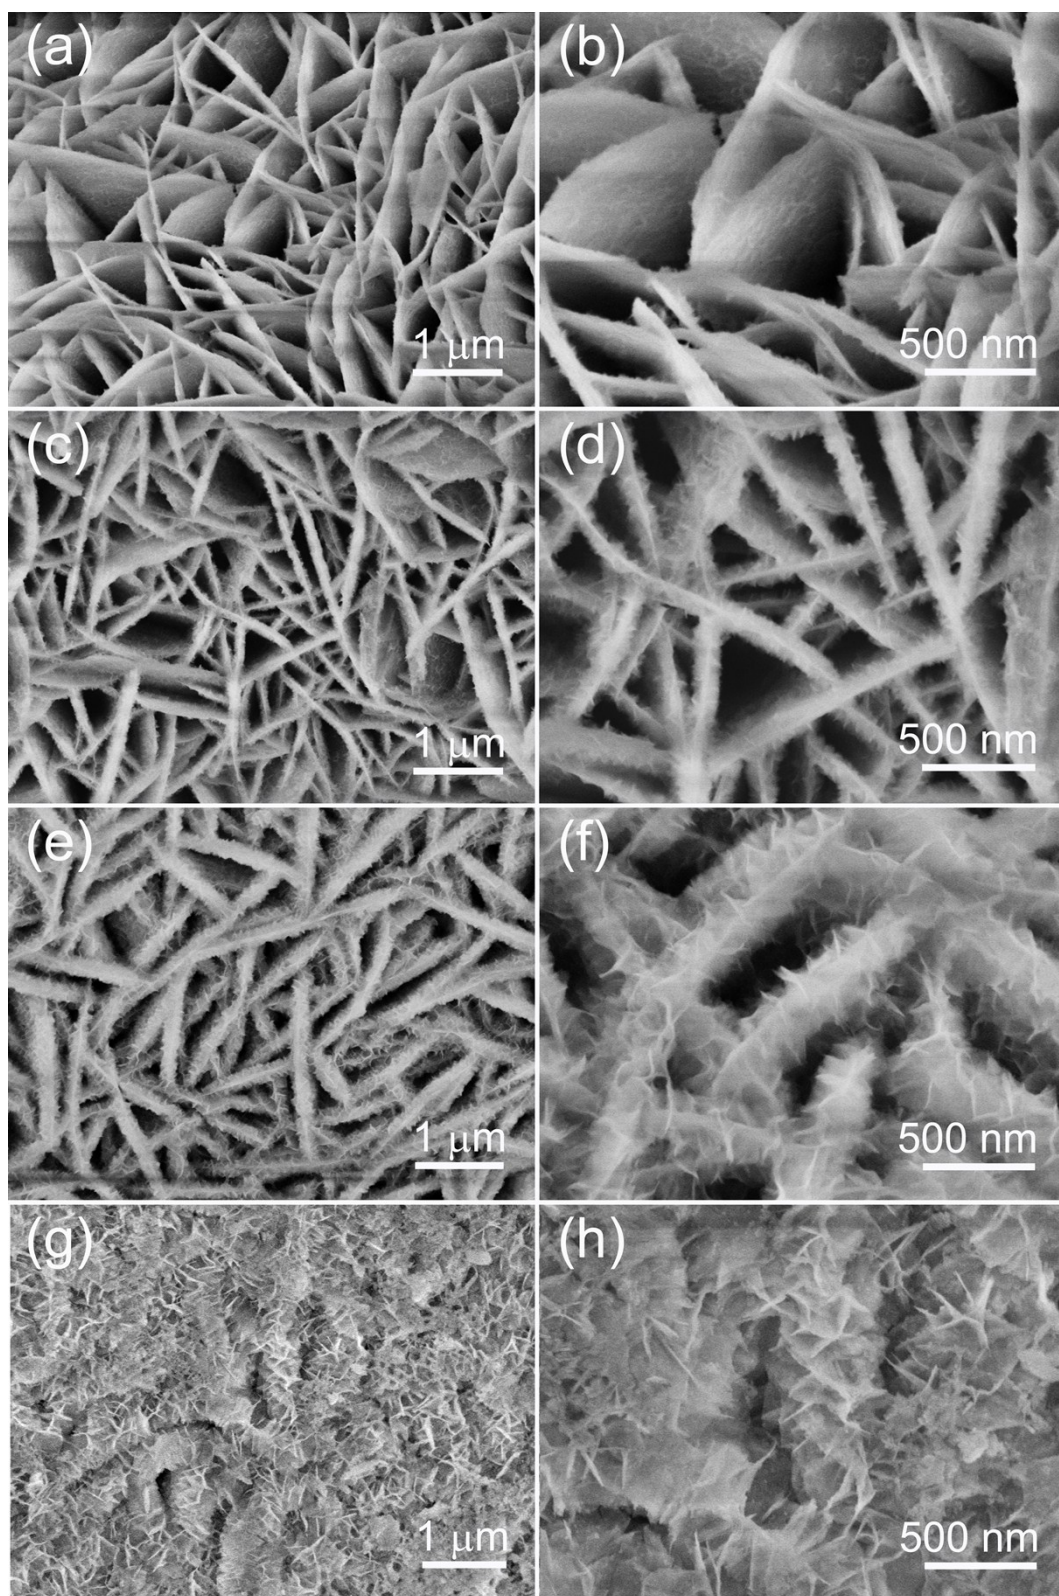

Fig. S7 SEM images of the morphology evolution of NiO@NiMoO<sub>4</sub> hybrid heterostructures at different reaction times. (a, b) 0.5 h, (c, d) 1 h, (e, f) 2 h, (g, h) 4 h.

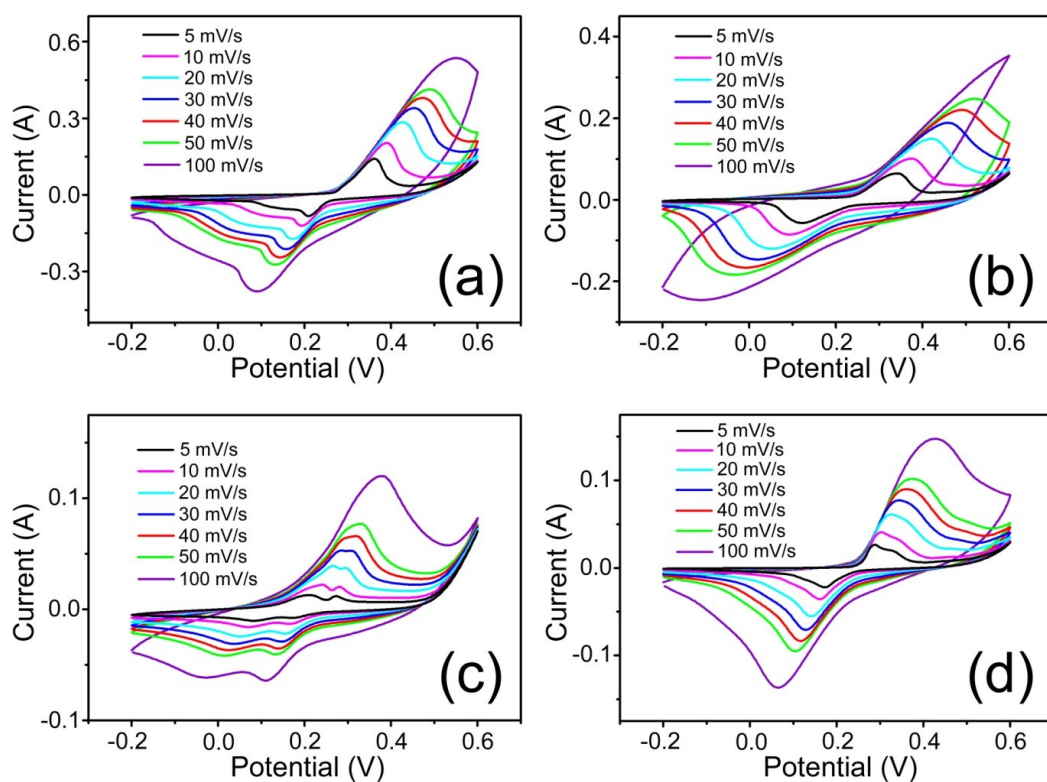

Fig. S8 CV curves at different scan rates of (a) NiO@NiMoO<sub>4</sub> hybrid composites, (b) NiO, (c) CoMoO<sub>4</sub> and (d) NiMoO<sub>4</sub> nanosheet arrays, respectively.

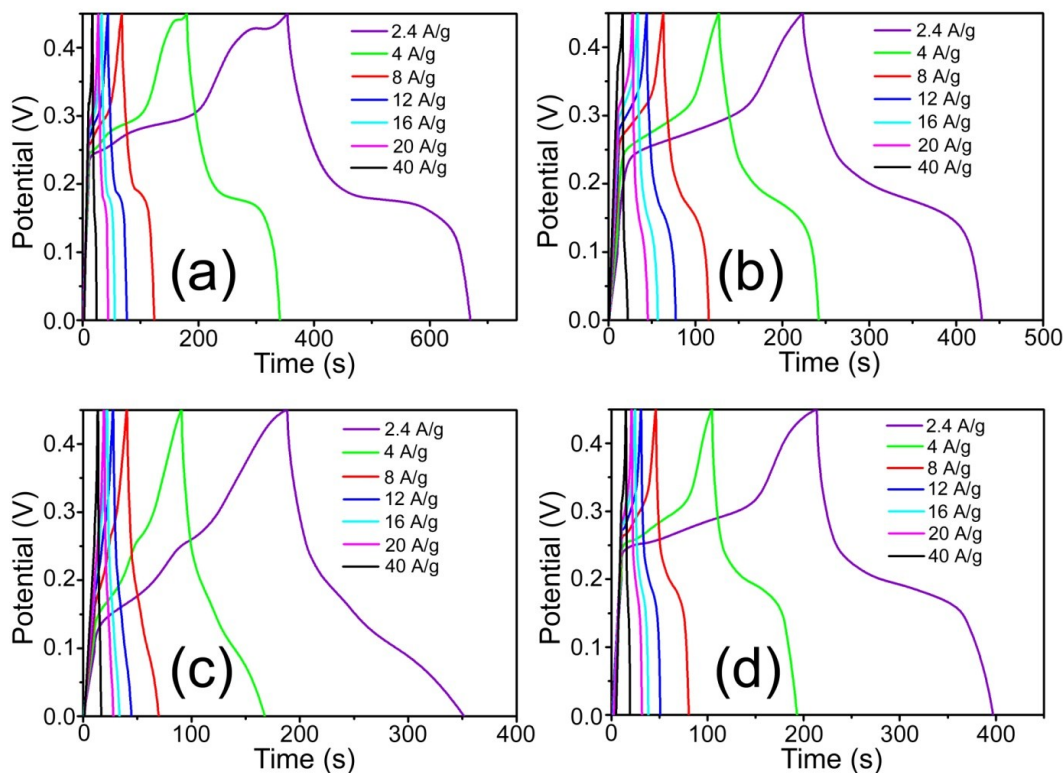

Fig. S9 Galvanostatic charge-discharge curves at different current densities of the (a) NiO@NiMoO<sub>4</sub> hybrid composites, (b) NiO, (c) CoMoO<sub>4</sub> and (d) NiMoO<sub>4</sub> nanosheet arrays, respectively.

Table S1 A comparison of the hierarchical NiO@MMoO<sub>4</sub> (M = Co, Ni) heterostructure electrode materials with other reported Ni- or Co- based electrodes in previous literatures.

| Electrode Materials                                                | Specific Capacitance                              | Ref.      |
|--------------------------------------------------------------------|---------------------------------------------------|-----------|
| NiO@CoMoO <sub>4</sub> heterostructures                            | 1834 F g <sup>-1</sup> at 2.4 A g <sup>-1</sup>   | This Work |
| NiO@NiMoO <sub>4</sub> heterostructures                            | 1685 F g <sup>-1</sup> at 2.4 A g <sup>-1</sup>   | This Work |
| NiO nano/microspheres                                              | 525 F g <sup>-1</sup> at 4 A g <sup>-1</sup>      | 17        |
| Flower-like NiO structures                                         | 340 F g <sup>-1</sup> at 1 A g <sup>-1</sup>      | 18        |
| Hierarchical NiO nanospheres                                       | 603 F g <sup>-1</sup> at 0.5 A g <sup>-1</sup>    | 19        |
| rGO-supported CoMoO <sub>4</sub> nanorods                          | 336.1 F g <sup>-1</sup> at 1 A g <sup>-1</sup>    | 42        |
| NiO/Co <sub>3</sub> O <sub>4</sub> core/shell composites           | 510 F g <sup>-1</sup> at 5 mA cm <sup>-1</sup>    | 43        |
| NiMoO <sub>4</sub> nanotubes                                       | 864 F g <sup>-1</sup> at 1 A g <sup>-1</sup>      | 44        |
| NiMoO <sub>4</sub> nanospheres                                     | 974.4 F g <sup>-1</sup> at 1 A g <sup>-1</sup>    | 45        |
| CoMoO <sub>4</sub> -NiMoO <sub>4</sub> • xH <sub>2</sub> O bundles | 1039 F g <sup>-1</sup> at 2.5 mA cm <sup>-1</sup> | 46        |
| NiMoO <sub>4</sub> • H <sub>2</sub> O nanoclusters                 | 680 F g <sup>-1</sup> at 1 A g <sup>-1</sup>      | 47        |
| MnMoO <sub>4</sub> /CoMoO <sub>4</sub> heterostructured nanowires  | 187.1 F g <sup>-1</sup> at 1 A g <sup>-1</sup>    | 48        |

## Calculations

The specific capacitance (C) of the electrode was calculated from the discharge curves using the following formula<sup>1</sup>:

$$C = \frac{I \times \Delta t}{m \times \Delta V}$$

where I (A),  $\Delta t$  (s), m (g), and  $\Delta V$  (V) are the discharge current, discharge time consumed in the potential range of  $\Delta V$ , mass of the active materials, and the potential windows, respectively. In this work, the area of the working electrode immersed into the electrolyte was controlled to be  $\sim 1 \text{ cm}^2$  and the specific capacitance at  $2.4 \text{ A g}^{-1}$  were calculated as below:

For NiO@CoMoO<sub>4</sub> hybrid heterostructures electrode,

$$C = 11.352 \text{ mA} \times 344 \text{ s} / [(3.41+1.32) \text{ mg} \times 0.45 \text{ V}] = 1834 \text{ F g}^{-1};$$

For NiO@NiMoO<sub>4</sub> hybrid heterostructures electrode,

$$C = 12 \text{ mA} \times 316 \text{ s} / [(3.79+1.21) \text{ mg} \times 0.45 \text{ V}] = 1685 \text{ F g}^{-1};$$

For NiO nanosheets electrode,

$$C = 9.312 \text{ mA} \times 206 \text{ s} / (3.88 \text{ mg} \times 0.45 \text{ V}) = 1099 \text{ F g}^{-1};$$

For CoMoO<sub>4</sub> nanoflakes electrode,

$$C = 3.744 \text{ mA} \times 163.5 \text{ s} / (1.56 \text{ mg} \times 0.45 \text{ V}) = 872 \text{ F g}^{-1};$$

For NiMoO<sub>4</sub> nanoflakes electrode,

$$C = 3.48 \text{ mA} \times 183.5 \text{ s} / (1.45 \text{ mg} \times 0.45 \text{ V}) = 979 \text{ F g}^{-1}.$$

The energy density (E) and power density (P) are calculated from the discharge curves using the following formula:

$$E = \frac{1}{2} \times C \times \Delta V^2$$

$$P = \frac{E}{\Delta t}$$



1. J. Yan, E. Khoo, A. Sumboja and P. S. Lee. *ACS Nano*, 2010, **4**, 4247.
